# Supplementary material for: Multi-component in situ and in-step formation of visible-light response C-dots composite TiO2 mesocrystals
Source: Royal Society of Chemistry journal article supplement (doi:10.1039/c5ra24475g), 2016-01-01
Supplement: c5ra24475g1.pdf [file c5ra24475g1.pdf]

## Supporting information

### Multi-components in-situ and in-step formation of response visible-light C-dots composite TiO<sub>2</sub> mesocrystals

Dong Yan,<sup>a,b</sup> Yun Liu,<sup>\*a</sup> Chun-yan Liu,<sup>\*a</sup> Zhi-ying Zhang,<sup>a</sup> Shi-dong Nie,<sup>a</sup>

#### 1 Preparation of C-dots/P25

##### (1) Preparation of C-dots:

The preparation of C-dots used a modified method reported by Liu et al<sup>1</sup>. 1g L-ascorbic acid was added into 50 ml ethanol and stirred, after then the mixture was transferred into Teflon-lined stainless autoclave and kept 4h at 180°C, the solution was collected and denoted as CDs.

##### (2) Preparation of C-dots/P25 composite:

C-dots/P25 composite was prepared following a two-step method reported by Zhang et al<sup>2</sup>. 1g P25 was mixed with 10ml CDs solution and 20ml deionized water thoroughly and stirred for 12h at room temperature. Then the mixture was transferred into Teflon-lined stainless autoclave and kept at 140°C for 4h. After centrifugation and vacuum drying at 40°C for another 12h, the solid product was achieved.

#### 2 The photocatalytic experiment for C-dots/P25 was carried out using the same procedures for the sample A-F.

1. B. Zhang, C.-y. Liu and Y. Liu, *Eur. J. Inorg. Chem.*, 2010, **2010**, 4411-4414.
2. H. Yu, Y. Zhao, C. Zhou, L. Shang, Y. Peng, Y. Cao, L.-Z. Wu, C.-H. Tung and T. Zhang, *J. Mater. Chem. A*, 2014, **2**, 3344.
